# Supplementary material
Source: PubMed Central journal article supplement (PMC2877479)
Supplement: kwq037_1.pdf [file kwq037_1.pdf]

## Web Appendix

Shows the causes of death for all the study participants as classified in Danish Cause-of-Death Registers. From this list a specialist in infectious diseases initially defined those included in the broader definition of infectious diseases. The list was secondly revised by a specialist in internal medicine and in case of disagreement the categorization was discussed until consensus. In the right column it is indicated whether the specific ICD code was classified as infectious (=1) or not (=0) in the present study.

| ICD_Code System | ICD code | Classified as death due to infection (=1) |
|-----------------|----------|-------------------------------------------|
|                 | 5 000    | 0                                         |
|                 | 5 050    | 0                                         |
|                 | 5 051    | 0                                         |
|                 | 5 052    | 0                                         |
|                 | 5 069    | 0                                         |
|                 | 5 070    | 0                                         |
|                 | 5 099    | 0                                         |
|                 | 5 100    | 1                                         |
|                 | 5 102    | 1                                         |
|                 | 5 105    | 1                                         |
|                 | 5 107    | 1                                         |
|                 | 5 108    | 1                                         |
|                 | 5 109    | 1                                         |
|                 | 5 110    | 1                                         |
|                 | 5 112    | 1                                         |
|                 | 5 120    | 1                                         |
|                 | 5 121    | 1                                         |
|                 | 5 123    | 1                                         |
|                 | 5 126    | 1                                         |
|                 | 5 128    | 1                                         |
|                 | 5 143    | 1                                         |
|                 | 5 144    | 1                                         |
|                 | 5 149    | 1                                         |
|                 | 5 150    | 1                                         |
|                 | 5 151    | 1                                         |
|                 | 5 153    | 1                                         |
|                 | 5 156    | 1                                         |
|                 | 5 157    | 1                                         |
|                 | 5 158    | 1                                         |
|                 | 5 171    | 1                                         |
|                 | 5 173    | 1                                         |
|                 | 5 180    | 1                                         |
|                 | 5 183    | 0                                         |
|                 | 5 200    | 0                                         |
|                 | 5 201    | 0                                         |
|                 | 5 210    | 0                                         |
|                 | 5 220    | 0                                         |
|                 | 5 222    | 0                                         |

|       |   |
|-------|---|
| 5 230 | 0 |
| 5 250 | 1 |
| 5 252 | 0 |
| 5 254 | 0 |
| 5 257 | 0 |
| 5 258 | 0 |
| 5 272 | 0 |
| 5 274 | 0 |
| 5 300 | 0 |
| 5 301 | 1 |
| 5 310 | 0 |
| 5 320 | 0 |
| 5 330 | 0 |
| 5 350 | 0 |
| 5 370 | 1 |
| 5 400 | 1 |
| 5 401 | 1 |
| 5 402 | 0 |
| 5 404 | 1 |
| 5 405 | 0 |
| 5 406 | 0 |
| 5 407 | 0 |
| 5 410 | 0 |
| 5 419 | 0 |
| 5 420 | 0 |
| 5 422 | 0 |
| 5 423 | 0 |
| 5 424 | 0 |
| 5 428 | 0 |
| 5 429 | 0 |
| 5 430 | 0 |
| 5 450 | 1 |
| 5 451 | 0 |
| 5 452 | 1 |
| 5 453 | 1 |
| 5 454 | 1 |
| 5 457 | 0 |
| 5 458 | 0 |
| 5 459 | 0 |
| 5 460 | 0 |
| 5 462 | 1 |
| 5 500 | 0 |
| 5 501 | 0 |
| 5 502 | 1 |
| 5 503 | 1 |
| 5 504 | 1 |
| 5 505 | 0 |
| 5 506 | 0 |
| 5 508 | 0 |
| 5 510 | 0 |

|       |   |
|-------|---|
| 5 511 | 0 |
| 5 512 | 0 |
| 5 527 | 1 |
| 5 529 | 1 |
| 5 530 | 0 |
| 5 550 | 0 |
| 5 551 | 0 |
| 5 552 | 1 |
| 5 553 | 0 |
| 5 554 | 0 |
| 5 555 | 0 |
| 5 575 | 0 |
| 5 580 | 0 |
| 5 581 | 1 |
| 5 604 | 0 |
| 5 605 | 0 |
| 5 611 | 1 |
| 5 620 | 0 |
| 5 630 | 0 |
| 5 640 | 0 |
| 5 660 | 0 |
| 5 670 | 1 |
| 5 672 | 0 |
| 5 701 | 0 |
| 5 702 | 0 |
| 5 703 | 0 |
| 5 704 | 0 |
| 5 705 | 0 |
| 5 706 | 0 |
| 5 707 | 0 |
| 5 708 | 0 |
| 5 709 | 0 |
| 5 710 | 0 |
| 5 716 | 0 |
| 5 721 | 0 |
| 5 722 | 0 |
| 5 723 | 0 |
| 5 724 | 0 |
| 5 730 | 0 |
| 5 732 | 0 |
| 5 735 | 0 |
| 5 736 | 0 |
| 5 739 | 0 |
| 5 740 | 0 |
| 5 770 | 0 |
| 5 800 | 0 |
| 5 840 | 0 |
| 5 845 | 0 |
| 5 850 | 0 |
| 5 851 | 0 |

|       |   |
|-------|---|
| 5 852 | 0 |
| 5 856 | 0 |
| 5 857 | 0 |
| 5 859 | 0 |
| 5 860 | 0 |
| 5 880 | 0 |
| 5 881 | 0 |
| 5 883 | 0 |
| 5 890 | 0 |
| 5 900 | 0 |
| 5 901 | 0 |
| 5 904 | 0 |
| 5 906 | 0 |
| 5 907 | 0 |
| 5 908 | 0 |
| 5 913 | 0 |
| 5 930 | 0 |
| 5 947 | 0 |
| 5 948 | 0 |
| 5 949 | 0 |
| 6 000 | 0 |
| 6 002 | 1 |
| 6 016 | 1 |
| 6 019 | 1 |
| 6 023 | 1 |
| 6 051 | 1 |
| 6 052 | 1 |
| 6 053 | 1 |
| 6 056 | 1 |
| 6 080 | 1 |
| 6 083 | 1 |
| 6 092 | 1 |
| 6 141 | 0 |
| 6 142 | 0 |
| 6 145 | 0 |
| 6 150 | 0 |
| 6 151 | 0 |
| 6 152 | 0 |
| 6 153 | 0 |
| 6 154 | 0 |
| 6 155 | 0 |
| 6 156 | 0 |
| 6 157 | 0 |
| 6 158 | 0 |
| 6 159 | 0 |
| 6 160 | 0 |
| 6 161 | 0 |
| 6 162 | 0 |
| 6 164 | 0 |
| 6 165 | 0 |

|       |   |
|-------|---|
| 6 170 | 0 |
| 6 171 | 0 |
| 6 172 | 0 |
| 6 174 | 0 |
| 6 175 | 0 |
| 6 177 | 0 |
| 6 178 | 0 |
| 6 180 | 0 |
| 6 181 | 0 |
| 6 191 | 0 |
| 6 193 | 0 |
| 6 194 | 0 |
| 6 196 | 0 |
| 6 197 | 0 |
| 6 199 | 0 |
| 6 200 | 0 |
| 6 201 | 0 |
| 6 203 | 0 |
| 6 204 | 0 |
| 6 216 | 0 |
| 6 219 | 0 |
| 6 223 | 0 |
| 6 230 | 0 |
| 6 231 | 0 |
| 6 234 | 0 |
| 6 236 | 0 |
| 6 237 | 0 |
| 6 241 | 0 |
| 6 252 | 0 |
| 6 260 | 0 |
| 6 272 | 0 |
| 6 274 | 0 |
| 6 289 | 0 |
| 6 290 | 0 |
| 6 292 | 0 |
| 6 296 | 0 |
| 6 297 | 0 |
| 6 298 | 0 |
| 6 300 | 0 |
| 6 301 | 0 |
| 6 304 | 0 |
| 6 305 | 0 |
| 6 322 | 0 |
| 6 323 | 0 |
| 6 325 | 0 |
| 6 330 | 0 |
| 6 331 | 0 |
| 6 332 | 0 |
| 6 334 | 0 |
| 6 340 | 1 |

|       |   |
|-------|---|
| 6 343 | 1 |
| 6 344 | 1 |
| 6 345 | 0 |
| 6 350 | 0 |
| 6 351 | 0 |
| 6 352 | 0 |
| 6 353 | 0 |
| 6 357 | 0 |
| 6 363 | 0 |
| 6 401 | 1 |
| 6 410 | 0 |
| 6 414 | 0 |
| 6 420 | 0 |
| 6 421 | 0 |
| 6 422 | 0 |
| 6 430 | 1 |
| 6 431 | 1 |
| 6 433 | 0 |
| 6 434 | 0 |
| 6 442 | 0 |
| 6 443 | 0 |
| 6 446 | 0 |
| 6 447 | 0 |
| 6 450 | 0 |
| 6 452 | 0 |
| 6 453 | 0 |
| 6 456 | 0 |
| 6 462 | 0 |
| 6 463 | 0 |
| 6 465 | 0 |
| 6 473 | 1 |
| 6 480 | 1 |
| 6 481 | 1 |
| 6 490 | 1 |
| 6 491 | 1 |
| 6 493 | 1 |
| 6 500 | 1 |
| 6 502 | 0 |
| 6 522 | 0 |
| 6 523 | 0 |
| 6 526 | 0 |
| 6 540 | 0 |
| 6 541 | 0 |
| 6 545 | 0 |
| 6 550 | 1 |
| 6 560 | 0 |
| 6 561 | 0 |
| 6 570 | 0 |
| 6 571 | 1 |
| 6 572 | 0 |

|       |   |
|-------|---|
| 6 576 | 1 |
| 6 581 | 0 |
| 6 582 | 1 |
| 6 583 | 0 |
| 6 584 | 0 |
| 6 585 | 1 |
| 6 586 | 0 |
| 6 587 | 0 |
| 6 590 | 1 |
| 6 591 | 0 |
| 6 592 | 0 |
| 6 600 | 1 |
| 6 602 | 0 |
| 6 603 | 0 |
| 6 605 | 1 |
| 6 610 | 0 |
| 6 611 | 1 |
| 6 615 | 0 |
| 6 631 | 0 |
| 6 637 | 0 |
| 6 648 | 0 |
| 6 652 | 0 |
| 6 670 | 0 |
| 6 675 | 0 |
| 6 678 | 0 |
| 6 704 | 0 |
| 6 722 | 0 |
| 6 752 | 0 |
| 6 754 | 0 |
| 6 758 | 0 |
| 6 760 | 0 |
| 6 762 | 0 |
| 6 770 | 0 |
| 6 773 | 0 |
| 6 774 | 0 |
| 6 776 | 0 |
| 6 783 | 0 |
| 6 792 | 0 |
| 6 794 | 0 |
| 6 795 | 0 |
| 6 800 | 0 |
| 6 803 | 0 |
| 6 804 | 0 |
| 6 805 | 0 |
| 6 806 | 0 |
| 6 807 | 0 |
| 6 808 | 0 |
| 6 812 | 0 |
| 6 814 | 0 |
| 6 815 | 0 |

|       |   |
|-------|---|
| 6 819 | 0 |
| 6 820 | 0 |
| 6 827 | 0 |
| 6 828 | 0 |
| 6 843 | 0 |
| 6 850 | 0 |
| 6 852 | 0 |
| 6 853 | 0 |
| 6 854 | 0 |
| 6 856 | 0 |
| 6 862 | 0 |
| 6 865 | 0 |
| 6 868 | 0 |
| 6 879 | 0 |
| 6 902 | 0 |
| 6 904 | 0 |
| 6 910 | 0 |
| 6 917 | 0 |
| 6 919 | 0 |
| 6 929 | 0 |
| 6 947 | 0 |
| 6 968 | 0 |
| 6 970 | 0 |
| 6 971 | 0 |
| 6 972 | 0 |
| 6 974 | 0 |
| 6 979 | 0 |
| 6 980 | 0 |
| 6 990 | 0 |
| 6 991 | 0 |
| 6 997 | 0 |
| 7 000 | 0 |
| 7 002 | 1 |
| 7 009 | 1 |
| 7 014 | 1 |
| 7 016 | 1 |
| 7 019 | 1 |
| 7 022 | 1 |
| 7 023 | 1 |
| 7 025 | 1 |
| 7 026 | 1 |
| 7 028 | 1 |
| 7 052 | 1 |
| 7 053 | 1 |
| 7 061 | 1 |
| 7 063 | 1 |
| 7 081 | 1 |
| 7 082 | 1 |
| 7 083 | 1 |
| 7 092 | 1 |



|       |   |
|-------|---|
| 7 096 | 1 |
| 7 138 | 1 |
| 7 141 | 0 |
| 7 142 | 0 |
| 7 144 | 0 |
| 7 145 | 0 |
| 7 146 | 0 |
| 7 150 | 0 |
| 7 151 | 0 |
| 7 153 | 0 |
| 7 154 | 0 |
| 7 155 | 0 |
| 7 157 | 0 |
| 7 158 | 0 |
| 7 159 | 0 |
| 7 160 | 0 |
| 7 161 | 0 |
| 7 162 | 0 |
| 7 164 | 0 |
| 7 165 | 0 |
| 7 170 | 0 |
| 7 171 | 0 |
| 7 172 | 0 |
| 7 173 | 0 |
| 7 174 | 0 |
| 7 175 | 0 |
| 7 176 | 0 |
| 7 177 | 0 |
| 7 178 | 0 |
| 7 179 | 0 |
| 7 180 | 0 |
| 7 181 | 0 |
| 7 190 | 0 |
| 7 191 | 0 |
| 7 193 | 0 |
| 7 194 | 0 |
| 7 195 | 0 |
| 7 196 | 0 |
| 7 197 | 0 |
| 7 199 | 0 |
| 7 200 | 0 |
| 7 201 | 0 |
| 7 203 | 0 |
| 7 204 | 0 |
| 7 212 | 0 |
| 7 214 | 0 |
| 7 216 | 0 |
| 7 219 | 0 |
| 7 223 | 0 |
| 7 230 | 0 |

|       |   |
|-------|---|
| 7 231 | 0 |
| 7 236 | 0 |
| 7 237 | 0 |
| 7 239 | 0 |
| 7 241 | 0 |
| 7 250 | 0 |
| 7 252 | 0 |
| 7 260 | 0 |
| 7 261 | 0 |
| 7 263 | 0 |
| 7 272 | 0 |
| 7 274 | 0 |
| 7 286 | 0 |
| 7 287 | 0 |
| 7 288 | 0 |
| 7 290 | 0 |
| 7 291 | 0 |
| 7 292 | 0 |
| 7 293 | 0 |
| 7 294 | 0 |
| 7 297 | 0 |
| 7 300 | 0 |
| 7 301 | 0 |
| 7 303 | 0 |
| 7 304 | 0 |
| 7 306 | 0 |
| 7 309 | 0 |
| 7 313 | 0 |
| 7 314 | 0 |
| 7 320 | 0 |
| 7 322 | 0 |
| 7 323 | 0 |
| 7 325 | 0 |
| 7 330 | 0 |
| 7 331 | 0 |
| 7 332 | 0 |
| 7 334 | 0 |
| 7 342 | 1 |
| 7 343 | 1 |
| 7 344 | 1 |
| 7 345 | 0 |
| 7 350 | 0 |
| 7 351 | 0 |
| 7 352 | 0 |
| 7 353 | 0 |
| 7 355 | 0 |
| 7 356 | 0 |
| 7 357 | 0 |
| 7 364 | 0 |
| 7 391 | 1 |

|       |   |
|-------|---|
| 7 410 | 0 |
| 7 411 | 0 |
| 7 416 | 0 |
| 7 420 | 0 |
| 7 421 | 0 |
| 7 422 | 0 |
| 7 430 | 1 |
| 7 431 | 1 |
| 7 432 | 1 |
| 7 433 | 0 |
| 7 434 | 0 |
| 7 442 | 0 |
| 7 443 | 0 |
| 7 444 | 0 |
| 7 446 | 0 |
| 7 447 | 0 |
| 7 450 | 0 |
| 7 451 | 0 |
| 7 453 | 0 |
| 7 454 | 0 |
| 7 455 | 0 |
| 7 456 | 0 |
| 7 462 | 0 |
| 7 463 | 0 |
| 7 464 | 0 |
| 7 465 | 0 |
| 7 466 | 0 |
| 7 470 | 1 |
| 7 480 | 1 |
| 7 481 | 1 |
| 7 490 | 1 |
| 7 491 | 1 |
| 7 493 | 1 |
| 7 500 | 1 |
| 7 501 | 0 |
| 7 502 | 0 |
| 7 517 | 0 |
| 7 518 | 1 |
| 7 519 | 1 |
| 7 521 | 1 |
| 7 522 | 0 |
| 7 523 | 0 |
| 7 525 | 0 |
| 7 526 | 0 |
| 7 527 | 0 |
| 7 537 | 0 |
| 7 539 | 0 |
| 7 540 | 0 |
| 7 541 | 0 |
| 7 543 | 0 |

|       |   |
|-------|---|
| 7 545 | 0 |
| 7 550 | 1 |
| 7 560 | 0 |
| 7 561 | 0 |
| 7 570 | 0 |
| 7 571 | 0 |
| 7 572 | 0 |
| 7 575 | 1 |
| 7 576 | 1 |
| 7 578 | 0 |
| 7 580 | 1 |
| 7 581 | 0 |
| 7 584 | 0 |
| 7 585 | 1 |
| 7 587 | 0 |
| 7 590 | 1 |
| 7 591 | 0 |
| 7 592 | 0 |
| 7 593 | 0 |
| 7 594 | 0 |
| 7 600 | 1 |
| 7 601 | 0 |
| 7 602 | 0 |
| 7 603 | 0 |
| 7 604 | 0 |
| 7 605 | 1 |
| 7 610 | 0 |
| 7 617 | 0 |
| 7 626 | 0 |
| 7 631 | 0 |
| 7 645 | 0 |
| 7 649 | 0 |
| 7 690 | 1 |
| 7 692 | 1 |
| 7 705 | 0 |
| 7 710 | 0 |
| 7 715 | 0 |
| 7 722 | 0 |
| 7 723 | 0 |
| 7 733 | 0 |
| 7 735 | 0 |
| 7 745 | 0 |
| 7 752 | 0 |
| 7 753 | 0 |
| 7 754 | 0 |
| 7 756 | 0 |
| 7 757 | 0 |
| 7 758 | 0 |
| 7 782 | 0 |
| 7 784 | 0 |

|       |   |
|-------|---|
| 7 785 | 0 |
| 7 788 | 0 |
| 7 790 | 0 |
| 7 792 | 0 |
| 7 794 | 0 |
| 7 795 | 0 |
| 7 800 | 0 |
| 7 801 | 0 |
| 7 802 | 0 |
| 7 803 | 0 |
| 7 804 | 0 |
| 7 805 | 0 |
| 7 806 | 0 |
| 7 807 | 0 |
| 7 808 | 0 |
| 7 809 | 0 |
| 7 810 | 0 |
| 7 812 | 0 |
| 7 813 | 0 |
| 7 814 | 0 |
| 7 815 | 0 |
| 7 816 | 0 |
| 7 819 | 0 |
| 7 820 | 0 |
| 7 821 | 0 |
| 7 822 | 0 |
| 7 823 | 0 |
| 7 824 | 0 |
| 7 827 | 0 |
| 7 828 | 0 |
| 7 830 | 0 |
| 7 835 | 0 |
| 7 843 | 0 |
| 7 850 | 0 |
| 7 851 | 0 |
| 7 853 | 0 |
| 7 855 | 0 |
| 7 861 | 0 |
| 7 863 | 0 |
| 7 864 | 0 |
| 7 866 | 0 |
| 7 867 | 0 |
| 7 869 | 0 |
| 7 871 | 0 |
| 7 878 | 0 |
| 7 880 | 0 |
| 7 881 | 0 |
| 7 885 | 0 |
| 7 890 | 0 |
| 7 900 | 0 |

|       |   |
|-------|---|
| 7 901 | 0 |
| 7 902 | 0 |
| 7 903 | 0 |
| 7 904 | 0 |
| 7 905 | 0 |
| 7 912 | 0 |
| 7 916 | 0 |
| 7 918 | 0 |
| 7 919 | 0 |
| 7 921 | 0 |
| 7 925 | 0 |
| 7 928 | 0 |
| 7 929 | 0 |
| 7 933 | 0 |
| 7 946 | 0 |
| 7 948 | 0 |
| 7 950 | 0 |
| 7 951 | 0 |
| 7 953 | 0 |
| 7 961 | 0 |
| 7 964 | 0 |
| 7 968 | 0 |
| 7 970 | 0 |
| 7 971 | 0 |
| 7 972 | 0 |
| 7 973 | 0 |
| 7 974 | 0 |
| 7 975 | 0 |
| 7 976 | 0 |
| 7 977 | 0 |
| 7 979 | 0 |
| 7 983 | 0 |
| 7 990 | 0 |
| 7 991 | 0 |
| 7 995 | 0 |
| 8 000 | 1 |
| 8 003 | 1 |
| 8 004 | 1 |
| 8 005 | 1 |
| 8 009 | 1 |
| 8 011 | 1 |
| 8 016 | 1 |
| 8 017 | 1 |
| 8 019 | 1 |
| 8 035 | 1 |
| 8 036 | 1 |
| 8 038 | 1 |
| 8 039 | 1 |
| 8 044 | 1 |
| 8 053 | 1 |

|       |   |
|-------|---|
| 8 054 | 1 |
| 8 055 | 1 |
| 8 065 | 1 |
| 8 070 | 1 |
| 8 079 | 1 |
| 8 093 | 1 |
| 8 094 | 1 |
| 8 097 | 1 |
| 8 112 | 1 |
| 8 117 | 1 |
| 8 127 | 1 |
| 8 135 | 0 |
| 8 136 | 1 |
| 8 140 | 0 |
| 8 141 | 0 |
| 8 142 | 0 |
| 8 143 | 0 |
| 8 144 | 0 |
| 8 145 | 0 |
| 8 146 | 0 |
| 8 147 | 0 |
| 8 148 | 0 |
| 8 149 | 0 |
| 8 150 | 0 |
| 8 151 | 0 |
| 8 152 | 0 |
| 8 153 | 0 |
| 8 154 | 0 |
| 8 155 | 0 |
| 8 156 | 0 |
| 8 157 | 0 |
| 8 158 | 0 |
| 8 159 | 0 |
| 8 160 | 0 |
| 8 161 | 0 |
| 8 162 | 0 |
| 8 163 | 0 |
| 8 170 | 0 |
| 8 171 | 0 |
| 8 172 | 0 |
| 8 173 | 0 |
| 8 174 | 0 |
| 8 180 | 0 |
| 8 182 | 0 |
| 8 183 | 0 |
| 8 184 | 0 |
| 8 185 | 0 |
| 8 186 | 0 |
| 8 187 | 0 |
| 8 188 | 0 |

|   |     |   |
|---|-----|---|
| 8 | 189 | 0 |
| 8 | 190 | 0 |
| 8 | 191 | 0 |
| 8 | 192 | 0 |
| 8 | 193 | 0 |
| 8 | 194 | 0 |
| 8 | 195 | 0 |
| 8 | 197 | 0 |
| 8 | 199 | 0 |
| 8 | 200 | 0 |
| 8 | 201 | 0 |
| 8 | 202 | 0 |
| 8 | 203 | 0 |
| 8 | 204 | 0 |
| 8 | 205 | 0 |
| 8 | 207 | 0 |
| 8 | 208 | 0 |
| 8 | 209 | 0 |
| 8 | 211 | 0 |
| 8 | 212 | 0 |
| 8 | 214 | 0 |
| 8 | 215 | 0 |
| 8 | 216 | 0 |
| 8 | 218 | 0 |
| 8 | 220 | 0 |
| 8 | 222 | 0 |
| 8 | 223 | 0 |
| 8 | 225 | 0 |
| 8 | 226 | 0 |
| 8 | 227 | 0 |
| 8 | 228 | 0 |
| 8 | 230 | 0 |
| 8 | 231 | 0 |
| 8 | 233 | 0 |
| 8 | 235 | 0 |
| 8 | 237 | 0 |
| 8 | 238 | 0 |
| 8 | 239 | 0 |
| 8 | 240 | 0 |
| 8 | 241 | 0 |
| 8 | 242 | 0 |
| 8 | 243 | 0 |
| 8 | 244 | 0 |
| 8 | 245 | 0 |
| 8 | 250 | 0 |
| 8 | 251 | 0 |
| 8 | 252 | 0 |
| 8 | 253 | 0 |
| 8 | 254 | 0 |
| 8 | 255 | 0 |



|       |   |
|-------|---|
| 8 263 | 0 |
| 8 265 | 0 |
| 8 268 | 0 |
| 8 269 | 0 |
| 8 270 | 0 |
| 8 272 | 0 |
| 8 273 | 0 |
| 8 274 | 0 |
| 8 275 | 0 |
| 8 276 | 0 |
| 8 277 | 0 |
| 8 279 | 0 |
| 8 280 | 0 |
| 8 281 | 0 |
| 8 282 | 0 |
| 8 283 | 0 |
| 8 284 | 0 |
| 8 285 | 0 |
| 8 286 | 0 |
| 8 287 | 0 |
| 8 288 | 0 |
| 8 289 | 0 |
| 8 290 | 0 |
| 8 291 | 0 |
| 8 293 | 0 |
| 8 294 | 0 |
| 8 295 | 0 |
| 8 296 | 0 |
| 8 297 | 0 |
| 8 298 | 0 |
| 8 299 | 0 |
| 8 300 | 0 |
| 8 301 | 0 |
| 8 302 | 0 |
| 8 303 | 0 |
| 8 304 | 0 |
| 8 306 | 0 |
| 8 307 | 0 |
| 8 310 | 0 |
| 8 311 | 0 |
| 8 312 | 0 |
| 8 314 | 0 |
| 8 315 | 0 |
| 8 320 | 1 |
| 8 322 | 1 |
| 8 323 | 1 |
| 8 324 | 1 |
| 8 330 | 0 |
| 8 331 | 0 |
| 8 332 | 0 |

|       |   |
|-------|---|
| 8 333 | 0 |
| 8 340 | 0 |
| 8 342 | 0 |
| 8 343 | 0 |
| 8 344 | 0 |
| 8 345 | 0 |
| 8 346 | 0 |
| 8 347 | 0 |
| 8 348 | 0 |
| 8 349 | 0 |
| 8 354 | 0 |
| 8 357 | 0 |
| 8 374 | 0 |
| 8 375 | 0 |
| 8 381 | 1 |
| 8 394 | 0 |
| 8 395 | 0 |
| 8 396 | 0 |
| 8 398 | 0 |
| 8 400 | 0 |
| 8 401 | 0 |
| 8 402 | 0 |
| 8 403 | 0 |
| 8 404 | 0 |
| 8 410 | 0 |
| 8 412 | 0 |
| 8 413 | 0 |
| 8 420 | 1 |
| 8 421 | 1 |
| 8 422 | 1 |
| 8 423 | 0 |
| 8 424 | 0 |
| 8 425 | 0 |
| 8 426 | 0 |
| 8 427 | 0 |
| 8 428 | 0 |
| 8 429 | 0 |
| 8 430 | 0 |
| 8 431 | 0 |
| 8 432 | 0 |
| 8 433 | 0 |
| 8 434 | 0 |
| 8 435 | 0 |
| 8 436 | 0 |
| 8 437 | 0 |
| 8 438 | 0 |
| 8 440 | 0 |
| 8 441 | 0 |
| 8 442 | 0 |
| 8 443 | 0 |

|       |   |
|-------|---|
| 8 444 | 0 |
| 8 445 | 0 |
| 8 446 | 0 |
| 8 447 | 0 |
| 8 450 | 0 |
| 8 451 | 0 |
| 8 452 | 0 |
| 8 453 | 0 |
| 8 454 | 0 |
| 8 456 | 0 |
| 8 458 | 0 |
| 8 460 | 1 |
| 8 462 | 1 |
| 8 463 | 1 |
| 8 465 | 1 |
| 8 466 | 1 |
| 8 470 | 1 |
| 8 471 | 1 |
| 8 472 | 1 |
| 8 474 | 1 |
| 8 480 | 1 |
| 8 481 | 1 |
| 8 482 | 1 |
| 8 483 | 1 |
| 8 484 | 1 |
| 8 485 | 1 |
| 8 486 | 1 |
| 8 490 | 0 |
| 8 491 | 0 |
| 8 492 | 0 |
| 8 493 | 0 |
| 8 501 | 1 |
| 8 508 | 0 |
| 8 510 | 1 |
| 8 511 | 1 |
| 8 513 | 1 |
| 8 514 | 0 |
| 8 515 | 0 |
| 8 517 | 0 |
| 8 518 | 0 |
| 8 519 | 0 |
| 8 527 | 0 |
| 8 530 | 0 |
| 8 531 | 0 |
| 8 532 | 0 |
| 8 533 | 0 |
| 8 535 | 0 |
| 8 536 | 0 |
| 8 537 | 0 |
| 8 540 | 1 |

|       |   |
|-------|---|
| 8 550 | 0 |
| 8 551 | 0 |
| 8 552 | 0 |
| 8 553 | 0 |
| 8 560 | 0 |
| 8 562 | 0 |
| 8 563 | 0 |
| 8 564 | 0 |
| 8 566 | 1 |
| 8 567 | 1 |
| 8 568 | 0 |
| 8 569 | 0 |
| 8 570 | 1 |
| 8 571 | 0 |
| 8 572 | 1 |
| 8 573 | 0 |
| 8 574 | 0 |
| 8 575 | 1 |
| 8 576 | 0 |
| 8 577 | 0 |
| 8 580 | 1 |
| 8 581 | 0 |
| 8 582 | 0 |
| 8 583 | 0 |
| 8 584 | 0 |
| 8 590 | 1 |
| 8 591 | 0 |
| 8 592 | 0 |
| 8 593 | 0 |
| 8 594 | 0 |
| 8 595 | 1 |
| 8 596 | 0 |
| 8 598 | 0 |
| 8 599 | 0 |
| 8 600 | 0 |
| 8 601 | 1 |
| 8 610 | 0 |
| 8 623 | 0 |
| 8 625 | 0 |
| 8 629 | 0 |
| 8 634 | 0 |
| 8 655 | 0 |
| 8 682 | 1 |
| 8 694 | 0 |
| 8 695 | 0 |
| 8 696 | 0 |
| 8 707 | 0 |
| 8 709 | 0 |
| 8 710 | 1 |
| 8 712 | 0 |

|       |   |
|-------|---|
| 8 713 | 0 |
| 8 717 | 0 |
| 8 718 | 0 |
| 8 720 | 1 |
| 8 721 | 0 |
| 8 722 | 0 |
| 8 723 | 0 |
| 8 725 | 0 |
| 8 733 | 0 |
| 8 734 | 0 |
| 8 735 | 0 |
| 8 740 | 0 |
| 8 741 | 0 |
| 8 742 | 0 |
| 8 743 | 0 |
| 8 744 | 0 |
| 8 745 | 0 |
| 8 746 | 0 |
| 8 747 | 0 |
| 8 748 | 0 |
| 8 749 | 0 |
| 8 750 | 0 |
| 8 751 | 0 |
| 8 752 | 0 |
| 8 753 | 0 |
| 8 754 | 0 |
| 8 755 | 0 |
| 8 756 | 0 |
| 8 758 | 0 |
| 8 759 | 0 |
| 8 760 | 0 |
| 8 761 | 0 |
| 8 762 | 0 |
| 8 763 | 0 |
| 8 766 | 0 |
| 8 767 | 0 |
| 8 768 | 0 |
| 8 769 | 0 |
| 8 770 | 0 |
| 8 771 | 0 |
| 8 772 | 0 |
| 8 774 | 0 |
| 8 775 | 0 |
| 8 776 | 0 |
| 8 777 | 0 |
| 8 778 | 0 |
| 8 780 | 0 |
| 8 782 | 0 |
| 8 784 | 0 |
| 8 785 | 0 |

|       |   |
|-------|---|
| 8 786 | 0 |
| 8 788 | 0 |
| 8 789 | 0 |
| 8 791 | 0 |
| 8 792 | 0 |
| 8 794 | 0 |
| 8 795 | 0 |
| 8 796 | 0 |
| 8 800 | 0 |
| 8 801 | 0 |
| 8 802 | 0 |
| 8 803 | 0 |
| 8 804 | 0 |
| 8 805 | 0 |
| 8 806 | 0 |
| 8 807 | 0 |
| 8 808 | 0 |
| 8 809 | 0 |
| 8 810 | 0 |
| 8 812 | 0 |
| 8 813 | 0 |
| 8 814 | 0 |
| 8 815 | 0 |
| 8 816 | 0 |
| 8 818 | 0 |
| 8 819 | 0 |
| 8 820 | 0 |
| 8 821 | 0 |
| 8 823 | 0 |
| 8 824 | 0 |
| 8 826 | 0 |
| 8 827 | 0 |
| 8 828 | 0 |
| 8 830 | 0 |
| 8 831 | 0 |
| 8 832 | 0 |
| 8 838 | 0 |
| 8 840 | 0 |
| 8 850 | 0 |
| 8 851 | 0 |
| 8 852 | 0 |
| 8 853 | 0 |
| 8 854 | 0 |
| 8 859 | 0 |
| 8 860 | 0 |
| 8 861 | 0 |
| 8 862 | 0 |
| 8 863 | 0 |
| 8 864 | 0 |
| 8 865 | 0 |

|       |   |
|-------|---|
| 8 867 | 0 |
| 8 868 | 0 |
| 8 869 | 0 |
| 8 870 | 0 |
| 8 873 | 0 |
| 8 874 | 0 |
| 8 880 | 0 |
| 8 881 | 0 |
| 8 882 | 0 |
| 8 883 | 0 |
| 8 884 | 0 |
| 8 885 | 0 |
| 8 887 | 0 |
| 8 890 | 0 |
| 8 891 | 0 |
| 8 895 | 0 |
| 8 897 | 0 |
| 8 898 | 0 |
| 8 899 | 0 |
| 8 900 | 0 |
| 8 901 | 0 |
| 8 902 | 0 |
| 8 906 | 0 |
| 8 910 | 0 |
| 8 911 | 0 |
| 8 912 | 0 |
| 8 913 | 0 |
| 8 915 | 0 |
| 8 916 | 0 |
| 8 918 | 0 |
| 8 920 | 0 |
| 8 921 | 0 |
| 8 922 | 0 |
| 8 923 | 0 |
| 8 924 | 0 |
| 8 925 | 0 |
| 8 927 | 0 |
| 8 929 | 0 |
| 8 930 | 0 |
| 8 931 | 0 |
| 8 933 | 0 |
| 8 934 | 0 |
| 8 938 | 0 |
| 8 940 | 0 |
| 8 942 | 0 |
| 8 943 | 0 |
| 8 946 | 0 |
| 8 947 | 0 |
| 8 948 | 0 |
| 8 949 | 0 |

|        |   |
|--------|---|
| 8 950  | 0 |
| 8 951  | 0 |
| 8 952  | 0 |
| 8 953  | 0 |
| 8 954  | 0 |
| 8 955  | 0 |
| 8 956  | 0 |
| 8 957  | 0 |
| 8 958  | 0 |
| 8 959  | 0 |
| 8 960  | 0 |
| 8 961  | 0 |
| 8 963  | 0 |
| 8 965  | 0 |
| 8 966  | 0 |
| 8 967  | 0 |
| 8 968  | 0 |
| 8 970  | 0 |
| 8 972  | 0 |
| 8 973  | 0 |
| 8 977  | 0 |
| 8 978  | 0 |
| 8 979  | 0 |
| 8 980  | 0 |
| 8 982  | 0 |
| 8 983  | 0 |
| 8 984  | 0 |
| 8 986  | 0 |
| 8 988  | 0 |
| 8 989  | 0 |
| 8 990  | 0 |
| 8 991  | 0 |
| 8 994  | 0 |
| 8 995  | 0 |
| 8 996  | 0 |
| 8 997  | 0 |
| 8 998  | 0 |
| 10 A04 | 1 |
| 10 A09 | 1 |
| 10 A16 | 1 |
| 10 A17 | 1 |
| 10 A31 | 1 |
| 10 A39 | 1 |
| 10 A40 | 1 |
| 10 A41 | 1 |
| 10 A46 | 1 |
| 10 A48 | 1 |
| 10 A49 | 1 |
| 10 A52 | 1 |
| 10 A85 | 1 |



|        |   |
|--------|---|
| 10 B02 | 1 |
| 10 B18 | 1 |
| 10 B20 | 1 |
| 10 B21 | 1 |
| 10 B22 | 1 |
| 10 B24 | 1 |
| 10 B25 | 1 |
| 10 B34 | 1 |
| 10 B91 | 1 |
| 10 B96 | 1 |
| 10 B97 | 1 |
| 10 B99 | 1 |
| 10 C00 | 0 |
| 10 C02 | 0 |
| 10 C03 | 0 |
| 10 C04 | 0 |
| 10 C06 | 0 |
| 10 C07 | 0 |
| 10 C08 | 0 |
| 10 C09 | 0 |
| 10 C10 | 0 |
| 10 C11 | 0 |
| 10 C13 | 0 |
| 10 C15 | 0 |
| 10 C16 | 0 |
| 10 C17 | 0 |
| 10 C18 | 0 |
| 10 C19 | 0 |
| 10 C20 | 0 |
| 10 C21 | 0 |
| 10 C22 | 0 |
| 10 C23 | 0 |
| 10 C24 | 0 |
| 10 C25 | 0 |
| 10 C26 | 0 |
| 10 C30 | 0 |
| 10 C31 | 0 |
| 10 C32 | 0 |
| 10 C34 | 0 |
| 10 C37 | 0 |
| 10 C38 | 0 |
| 10 C40 | 0 |
| 10 C41 | 0 |
| 10 C43 | 0 |
| 10 C44 | 0 |
| 10 C45 | 0 |
| 10 C47 | 0 |
| 10 C48 | 0 |
| 10 C49 | 0 |
| 10 C50 | 0 |

|    |     |   |
|----|-----|---|
| 10 | C51 | 0 |
| 10 | C52 | 0 |
| 10 | C53 | 0 |
| 10 | C54 | 0 |
| 10 | C55 | 0 |
| 10 | C56 | 0 |
| 10 | C57 | 0 |
| 10 | C60 | 0 |
| 10 | C61 | 0 |
| 10 | C64 | 0 |
| 10 | C65 | 0 |
| 10 | C66 | 0 |
| 10 | C67 | 0 |
| 10 | C69 | 0 |
| 10 | C71 | 0 |
| 10 | C73 | 0 |
| 10 | C74 | 0 |
| 10 | C75 | 0 |
| 10 | C76 | 0 |
| 10 | C80 | 0 |
| 10 | C81 | 0 |
| 10 | C83 | 0 |
| 10 | C84 | 0 |
| 10 | C85 | 0 |
| 10 | C88 | 0 |
| 10 | C90 | 0 |
| 10 | C91 | 0 |
| 10 | C92 | 0 |
| 10 | C96 | 0 |
| 10 | C97 | 0 |
| 10 | D01 | 0 |
| 10 | D10 | 0 |
| 10 | D11 | 0 |
| 10 | D12 | 0 |
| 10 | D13 | 0 |
| 10 | D18 | 0 |
| 10 | D30 | 0 |
| 10 | D32 | 0 |
| 10 | D33 | 0 |
| 10 | D35 | 0 |
| 10 | D37 | 0 |
| 10 | D38 | 0 |
| 10 | D41 | 0 |
| 10 | D43 | 0 |
| 10 | D44 | 0 |
| 10 | D45 | 0 |
| 10 | D46 | 0 |
| 10 | D47 | 0 |
| 10 | D48 | 0 |
| 10 | D51 | 0 |

|        |   |
|--------|---|
| 10 D53 | 0 |
| 10 D59 | 0 |
| 10 D61 | 0 |
| 10 D63 | 0 |
| 10 D64 | 0 |
| 10 D65 | 0 |
| 10 D68 | 0 |
| 10 D69 | 0 |
| 10 D75 | 0 |
| 10 D76 | 0 |
| 10 D80 | 0 |
| 10 D86 | 0 |
| 10 E03 | 0 |
| 10 E04 | 0 |
| 10 E05 | 0 |
| 10 E10 | 0 |
| 10 E11 | 0 |
| 10 E14 | 0 |
| 10 E22 | 0 |
| 10 E27 | 0 |
| 10 E34 | 0 |
| 10 E41 | 0 |
| 10 E46 | 0 |
| 10 E54 | 0 |
| 10 E64 | 0 |
| 10 E66 | 0 |
| 10 E74 | 0 |
| 10 E75 | 0 |
| 10 E76 | 0 |
| 10 E78 | 0 |
| 10 E83 | 0 |
| 10 E85 | 0 |
| 10 E86 | 0 |
| 10 E87 | 0 |
| 10 E88 | 0 |
| 10 F00 | 0 |
| 10 F01 | 0 |
| 10 F02 | 0 |
| 10 F03 | 0 |
| 10 F09 | 0 |
| 10 F10 | 0 |
| 10 F11 | 0 |
| 10 F15 | 0 |
| 10 F17 | 0 |
| 10 F19 | 0 |
| 10 F20 | 0 |
| 10 F22 | 0 |
| 10 F29 | 0 |
| 10 F31 | 0 |
| 10 F32 | 0 |

|        |   |
|--------|---|
| 10 F33 | 0 |
| 10 F34 | 0 |
| 10 F41 | 0 |
| 10 F43 | 0 |
| 10 F45 | 0 |
| 10 F48 | 0 |
| 10 F55 | 0 |
| 10 F61 | 0 |
| 10 F69 | 0 |
| 10 F70 | 0 |
| 10 F73 | 0 |
| 10 F79 | 0 |
| 10 F99 | 0 |
| 10 G00 | 1 |
| 10 G03 | 1 |
| 10 G04 | 1 |
| 10 G06 | 1 |
| 10 G11 | 0 |
| 10 G12 | 0 |
| 10 G20 | 0 |
| 10 G21 | 0 |
| 10 G23 | 0 |
| 10 G30 | 0 |
| 10 G31 | 0 |
| 10 G35 | 0 |
| 10 G37 | 0 |
| 10 G40 | 0 |
| 10 G41 | 0 |
| 10 G43 | 0 |
| 10 G44 | 0 |
| 10 G45 | 0 |
| 10 G46 | 0 |
| 10 G62 | 0 |
| 10 G64 | 0 |
| 10 G70 | 0 |
| 10 G71 | 0 |
| 10 G80 | 0 |
| 10 G81 | 0 |
| 10 G82 | 0 |
| 10 G83 | 0 |
| 10 G90 | 0 |
| 10 G91 | 0 |
| 10 G92 | 0 |
| 10 G93 | 0 |
| 10 G94 | 0 |
| 10 G95 | 0 |
| 10 G96 | 0 |
| 10 H34 | 0 |
| 10 H49 | 0 |
| 10 H54 | 0 |

|        |   |
|--------|---|
| 10 H66 | 1 |
| 10 H67 | 1 |
| 10 I00 | 1 |
| 10 I05 | 0 |
| 10 I06 | 0 |
| 10 I08 | 0 |
| 10 I10 | 0 |
| 10 I11 | 0 |
| 10 I12 | 0 |
| 10 I13 | 0 |
| 10 I20 | 0 |
| 10 I21 | 0 |
| 10 I22 | 0 |
| 10 I24 | 0 |
| 10 I25 | 0 |
| 10 I26 | 0 |
| 10 I27 | 0 |
| 10 I30 | 1 |
| 10 I31 | 0 |
| 10 I33 | 1 |
| 10 I34 | 0 |
| 10 I35 | 0 |
| 10 I36 | 0 |
| 10 I37 | 0 |
| 10 I38 | 1 |
| 10 I42 | 0 |
| 10 I43 | 0 |
| 10 I44 | 0 |
| 10 I45 | 0 |
| 10 I46 | 0 |
| 10 I47 | 0 |
| 10 I48 | 0 |
| 10 I49 | 0 |
| 10 I50 | 0 |
| 10 I51 | 0 |
| 10 I60 | 0 |
| 10 I61 | 0 |
| 10 I62 | 0 |
| 10 I63 | 0 |
| 10 I64 | 0 |
| 10 I65 | 0 |
| 10 I66 | 0 |
| 10 I67 | 0 |
| 10 I69 | 0 |
| 10 I70 | 0 |
| 10 I71 | 0 |
| 10 I73 | 0 |
| 10 I74 | 0 |
| 10 I77 | 0 |
| 10 I80 | 0 |

|        |   |
|--------|---|
| 10 I82 | 0 |
| 10 I85 | 0 |
| 10 I87 | 0 |
| 10 I89 | 0 |
| 10 I95 | 0 |
| 10 I99 | 0 |
| 10 J02 | 1 |
| 10 J03 | 1 |
| 10 J06 | 1 |
| 10 J11 | 1 |
| 10 J12 | 1 |
| 10 J13 | 1 |
| 10 J14 | 1 |
| 10 J15 | 1 |
| 10 J18 | 1 |
| 10 J20 | 1 |
| 10 J22 | 1 |
| 10 J39 | 0 |
| 10 J40 | 0 |
| 10 J42 | 0 |
| 10 J43 | 0 |
| 10 J44 | 0 |
| 10 J45 | 0 |
| 10 J46 | 0 |
| 10 J60 | 0 |
| 10 J69 | 0 |
| 10 J70 | 0 |
| 10 J80 | 0 |
| 10 J81 | 0 |
| 10 J84 | 0 |
| 10 J85 | 1 |
| 10 J86 | 1 |
| 10 J90 | 0 |
| 10 J92 | 0 |
| 10 J94 | 0 |
| 10 J96 | 0 |
| 10 J98 | 0 |
| 10 K21 | 0 |
| 10 K22 | 0 |
| 10 K25 | 0 |
| 10 K26 | 0 |
| 10 K27 | 0 |
| 10 K28 | 0 |
| 10 K29 | 0 |
| 10 K35 | 1 |
| 10 K40 | 0 |
| 10 K41 | 0 |
| 10 K43 | 0 |
| 10 K44 | 0 |
| 10 K50 | 0 |

|    |     |   |
|----|-----|---|
| 10 | K51 | 0 |
| 10 | K52 | 0 |
| 10 | K55 | 0 |
| 10 | K56 | 0 |
| 10 | K57 | 0 |
| 10 | K59 | 0 |
| 10 | K61 | 1 |
| 10 | K62 | 0 |
| 10 | K63 | 0 |
| 10 | K65 | 1 |
| 10 | K66 | 0 |
| 10 | K70 | 0 |
| 10 | K71 | 0 |
| 10 | K72 | 0 |
| 10 | K73 | 1 |
| 10 | K74 | 0 |
| 10 | K75 | 0 |
| 10 | K76 | 0 |
| 10 | K80 | 0 |
| 10 | K81 | 1 |
| 10 | K82 | 0 |
| 10 | K85 | 0 |
| 10 | K86 | 0 |
| 10 | K90 | 0 |
| 10 | K91 | 0 |
| 10 | K92 | 0 |
| 10 | L02 | 1 |
| 10 | L12 | 0 |
| 10 | L89 | 0 |
| 10 | L97 | 0 |
| 10 | L98 | 0 |
| 10 | M05 | 0 |
| 10 | M06 | 0 |
| 10 | M10 | 0 |
| 10 | M16 | 0 |
| 10 | M17 | 0 |
| 10 | M19 | 0 |
| 10 | M31 | 0 |
| 10 | M32 | 0 |
| 10 | M35 | 0 |
| 10 | M41 | 0 |
| 10 | M45 | 0 |
| 10 | M48 | 0 |
| 10 | M79 | 0 |
| 10 | M80 | 0 |
| 10 | M81 | 0 |
| 10 | M86 | 1 |
| 10 | M90 | 0 |
| 10 | N00 | 1 |
| 10 | N02 | 0 |

|        |   |
|--------|---|
| 10 N03 | 0 |
| 10 N04 | 0 |
| 10 N05 | 1 |
| 10 N10 | 1 |
| 10 N11 | 0 |
| 10 N12 | 1 |
| 10 N13 | 0 |
| 10 N14 | 0 |
| 10 N16 | 0 |
| 10 N17 | 0 |
| 10 N18 | 0 |
| 10 N19 | 0 |
| 10 N20 | 0 |
| 10 N21 | 0 |
| 10 N26 | 0 |
| 10 N28 | 0 |
| 10 N30 | 1 |
| 10 N36 | 0 |
| 10 N39 | 0 |
| 10 N40 | 0 |
| 10 N49 | 1 |
| 10 N84 | 0 |
| 10 P00 | 0 |
| 10 P01 | 0 |
| 10 P02 | 0 |
| 10 P03 | 0 |
| 10 P05 | 0 |
| 10 P07 | 0 |
| 10 P10 | 0 |
| 10 P11 | 0 |
| 10 P21 | 0 |
| 10 P22 | 0 |
| 10 P23 | 0 |
| 10 P24 | 0 |
| 10 P25 | 0 |
| 10 P26 | 0 |
| 10 P27 | 0 |
| 10 P28 | 0 |
| 10 P29 | 0 |
| 10 P35 | 1 |
| 10 P36 | 0 |
| 10 P50 | 0 |
| 10 P51 | 0 |
| 10 P52 | 0 |
| 10 P54 | 0 |
| 10 P60 | 0 |
| 10 P61 | 0 |
| 10 P74 | 0 |
| 10 P77 | 0 |
| 10 P78 | 0 |



|    |     |   |
|----|-----|---|
| 10 | P83 | 0 |
| 10 | P95 | 0 |
| 10 | Q00 | 0 |
| 10 | Q01 | 0 |
| 10 | Q02 | 0 |
| 10 | Q03 | 0 |
| 10 | Q04 | 0 |
| 10 | Q05 | 0 |
| 10 | Q07 | 0 |
| 10 | Q20 | 0 |
| 10 | Q21 | 0 |
| 10 | Q23 | 0 |
| 10 | Q24 | 0 |
| 10 | Q25 | 0 |
| 10 | Q28 | 0 |
| 10 | Q33 | 0 |
| 10 | Q39 | 0 |
| 10 | Q42 | 0 |
| 10 | Q43 | 0 |
| 10 | Q44 | 0 |
| 10 | Q56 | 0 |
| 10 | Q60 | 0 |
| 10 | Q61 | 0 |
| 10 | Q64 | 0 |
| 10 | Q67 | 0 |
| 10 | Q68 | 0 |
| 10 | Q71 | 0 |
| 10 | Q75 | 0 |
| 10 | Q76 | 0 |
| 10 | Q77 | 0 |
| 10 | Q78 | 0 |
| 10 | Q79 | 0 |
| 10 | Q85 | 0 |
| 10 | Q87 | 0 |
| 10 | Q89 | 0 |
| 10 | Q90 | 0 |
| 10 | Q91 | 0 |
| 10 | Q96 | 0 |
| 10 | Q99 | 0 |
| 10 | R02 | 0 |
| 10 | R04 | 0 |
| 10 | R06 | 0 |
| 10 | R07 | 0 |
| 10 | R10 | 0 |
| 10 | R17 | 0 |
| 10 | R18 | 0 |
| 10 | R33 | 0 |
| 10 | R42 | 0 |
| 10 | R50 | 0 |
| 10 | R54 | 0 |

|    |     |   |
|----|-----|---|
| 10 | R57 | 0 |
| 10 | R60 | 0 |
| 10 | R62 | 0 |
| 10 | R63 | 0 |
| 10 | R64 | 0 |
| 10 | R68 | 0 |
| 10 | R95 | 0 |
| 10 | R96 | 0 |
| 10 | R98 | 0 |
| 10 | R99 | 0 |
| 10 | S02 | 0 |
| 10 | S06 | 0 |
| 10 | S07 | 0 |
| 10 | S08 | 0 |
| 10 | S09 | 0 |
| 10 | S12 | 0 |
| 10 | S14 | 0 |
| 10 | S15 | 0 |
| 10 | S19 | 0 |
| 10 | S22 | 0 |
| 10 | S25 | 0 |
| 10 | S26 | 0 |
| 10 | S27 | 0 |
| 10 | S28 | 0 |
| 10 | S29 | 0 |
| 10 | S32 | 0 |
| 10 | S36 | 0 |
| 10 | S42 | 0 |
| 10 | S72 | 0 |
| 10 | S82 | 0 |
| 10 | S88 | 0 |
| 10 | T02 | 0 |
| 10 | T04 | 0 |
| 10 | T06 | 0 |
| 10 | T07 | 0 |
| 10 | T09 | 0 |
| 10 | T11 | 0 |
| 10 | T17 | 0 |
| 10 | T20 | 0 |
| 10 | T21 | 0 |
| 10 | T27 | 0 |
| 10 | T28 | 0 |
| 10 | T29 | 0 |
| 10 | T30 | 0 |
| 10 | T38 | 0 |
| 10 | T39 | 0 |
| 10 | T40 | 0 |
| 10 | T42 | 0 |
| 10 | T43 | 0 |
| 10 | T50 | 0 |

|        |   |
|--------|---|
| 10 T51 | 0 |
| 10 T58 | 0 |
| 10 T59 | 0 |
| 10 T66 | 0 |
| 10 T68 | 0 |
| 10 T69 | 0 |
| 10 T71 | 0 |
| 10 T75 | 0 |
| 10 T78 | 0 |
| 10 T79 | 0 |
| 10 T80 | 0 |
| 10 T81 | 0 |
| 10 T84 | 0 |
| 10 T85 | 0 |
| 10 T87 | 0 |
| 10 T90 | 0 |
| 10 T93 | 0 |
| 10 V02 | 0 |
| 10 V03 | 0 |
| 10 V04 | 0 |
| 10 V05 | 0 |
| 10 V09 | 0 |
| 10 V12 | 0 |
| 10 V14 | 0 |
| 10 V23 | 0 |
| 10 V27 | 0 |
| 10 V43 | 0 |
| 10 V44 | 0 |
| 10 V45 | 0 |
| 10 V47 | 0 |
| 10 V48 | 0 |
| 10 V49 | 0 |
| 10 V80 | 0 |
| 10 V90 | 0 |
| 10 V94 | 0 |
| 10 V95 | 0 |
| 10 V97 | 0 |
| 10 V99 | 0 |
| 10 W10 | 0 |
| 10 W11 | 0 |
| 10 W13 | 0 |
| 10 W19 | 0 |
| 10 W20 | 0 |
| 10 W24 | 0 |
| 10 W68 | 0 |
| 10 W69 | 0 |
| 10 W70 | 0 |
| 10 W74 | 0 |
| 10 W76 | 0 |
| 10 W77 | 0 |

|    |     |   |
|----|-----|---|
| 10 | W78 | 0 |
| 10 | W79 | 0 |
| 10 | W80 | 0 |
| 10 | W86 | 0 |
| 10 | X00 | 0 |
| 10 | X02 | 0 |
| 10 | X05 | 0 |
| 10 | X08 | 0 |
| 10 | X09 | 0 |
| 10 | X23 | 0 |
| 10 | X31 | 0 |
| 10 | X42 | 0 |
| 10 | X44 | 0 |
| 10 | X45 | 0 |
| 10 | X59 | 0 |
| 10 | X60 | 0 |
| 10 | X61 | 0 |
| 10 | X62 | 0 |
| 10 | X64 | 0 |
| 10 | X65 | 0 |
| 10 | X67 | 0 |
| 10 | X70 | 0 |
| 10 | X71 | 0 |
| 10 | X72 | 0 |
| 10 | X73 | 0 |
| 10 | X74 | 0 |
| 10 | X78 | 0 |
| 10 | X80 | 0 |
| 10 | X81 | 0 |
| 10 | X82 | 0 |
| 10 | X83 | 0 |
| 10 | X91 | 0 |
| 10 | X92 | 0 |
| 10 | X94 | 0 |
| 10 | X99 | 0 |
| 10 | Y04 | 0 |
| 10 | Y10 | 0 |
| 10 | Y11 | 0 |
| 10 | Y12 | 0 |
| 10 | Y14 | 0 |
| 10 | Y15 | 0 |
| 10 | Y17 | 0 |
| 10 | Y19 | 0 |
| 10 | Y20 | 0 |
| 10 | Y21 | 0 |
| 10 | Y22 | 0 |
| 10 | Y26 | 0 |
| 10 | Y30 | 0 |
| 10 | Y33 | 0 |
| 10 | Y34 | 0 |

|    |     |   |
|----|-----|---|
| 10 | Y42 | 0 |
| 10 | Y43 | 0 |
| 10 | Y45 | 0 |
| 10 | Y46 | 0 |
| 10 | Y60 | 0 |
| 10 | Y65 | 0 |
| 10 | Y73 | 0 |
| 10 | Y85 | 0 |
| 10 | Y86 | 0 |
| 10 | Y90 | 0 |
| 10 | Y91 | 0 |
| 10 | Z49 | 0 |
| 10 | Z94 | 0 |
| 10 | Z95 | 0 |
| 10 | Z99 | 0 |
